# Supplementary material
Source: PubMed Central journal article supplement (PMC4263626)
Supplement: 130091suppa1.pdf [file 130091suppa1.pdf]

**Table E1.** Summary of Data Acquisition and Postprocessing Methods of Hepatic CT Perfusion Imaging Studies

| Study and Reference No. | Journal/Year                  | Subject Type/No. of Subjects | Acquisition Parameters |                 | Contrast Agent                                          |                         | Latest Scan Time (sec) | Analysis Model                     | Mean Radiation Dose (mSv) |
|-------------------------|-------------------------------|------------------------------|------------------------|-----------------|---------------------------------------------------------|-------------------------|------------------------|------------------------------------|---------------------------|
|                         |                               |                              | Scanner/Detector Rows  | kVp/mAs         | Amount (mL)/Concentration (mg iodine per mL)            | Injection Rate (mL/sec) |                        |                                    |                           |
| Blomley et al (33)      | J Comput Assist Tomogr/1995   | Human/51                     | SD CT                  | NA              | 25/300*                                                 | 10                      | 90                     | Maximum slope                      | NA                        |
| Leggett et al (35)      | Radiology/1997                | Human/27                     | SD CT                  | NA              | 50/300                                                  | ≥ 7                     | 37                     | Maximum slope                      | NA                        |
| Miles et al (36)        | Br J Radiol/1998              | Human/13                     | SD CT                  | NA              | 40–50/300                                               | ≥ 5–7                   | 45                     | Maximum slope                      | NA                        |
| Cuenod et al (45)       | Radiology/2001                | Rat/11                       | SD CT                  | 80/200          | 1 mL per body kg/350 <sup>†</sup>                       | NA                      | 30                     | Distributed parameter (dual-input) | NA                        |
| Tsushima et al (68)     | Dig Dis Sci/2001              | Human/35                     | SD CT                  | NA              | 40/320                                                  | 5                       | 85                     | Maximum slope                      | NA                        |
| Materne et al (46)      | Clin Sci/2000                 | Rabbit/18, Human/10          | SD CT                  | 120/100         | 1 mL per body kg/350 <sup>‡</sup> , 40/350 <sup>§</sup> | 1, 7                    | 60, 120                | Compartment (dual-input)           | NA                        |
| Xiong et al (87)        | Invest New Drugs/2004         | Human/7                      | MD CT/NA               | NA              | 40/320                                                  | 7                       | 35                     | Distributed parameter              | NA                        |
| Kan et al (89)          | Radiology/2005                | Rat/20                       | MD CT/NA               | 120/80          | 0.15 mL per body kg/320                                 | NA                      | 50                     | Distributed parameter              | NA                        |
| Shi et al (69)          | Ai Zheng/2006                 | Rat/29                       | MD CT/4                | 80/150          | 2/NA                                                    | 1                       | 30                     | Maximum slope                      | NA                        |
| Sahani et al (62)       | Radiology/2007                | Human/30                     | MD CT/16               | 100/240         | 70/300                                                  | 7                       | 30–35                  | Distributed parameter              | 7.3–8.7                   |
| Zhu et al (63)          | Oncology/2008                 | Human/33                     | MD CT/16               | 100–120/200–240 | 70/300                                                  | 7                       | 240                    | Distributed parameter              | NA                        |
| Ippolito et al (58)     | Acad Radiol/2008              | Human/47                     | MD CT/NA               | 80/120          | 50/350                                                  | 6                       | 40                     | Maximum slope                      | 10                        |
| Meijerink et al (27)    | Eur Radiol/2008               | Human/20                     | MD CT/64               | 120/80          | 100/300                                                 | 6 <sup>§</sup>          | 300                    | Maximum slope                      | 24                        |
| Choi et al (90)         | Invest Radiol/2010            | Rabbit/14                    | MD CT/8                | 120/200         | 4/370                                                   | 1                       | 90                     | Distributed parameter              | NA                        |
| Meijerink et al (115)   | Ultrasound in Med & Biol/2010 | Human/30                     | MD CT/64               | 120/80          | 100/300                                                 | 6 <sup>§</sup>          | 300                    | Maximum slope                      | 24                        |
| Guyennon et al (55)     | World J Radiol/2010           | Human/16                     | MD CT/32               | 80/100          | 0.5 mg per body kg/350                                  | 4                       | 125                    | Distributed parameter/compartment  | NA                        |

|                     |                               |          |           |                 |                        |                  |       |                           |                   |
|---------------------|-------------------------------|----------|-----------|-----------------|------------------------|------------------|-------|---------------------------|-------------------|
| Ippolito et al (94) | World J Gastroenterol/2010    | Human/32 | MD CT/16  | 120/120         | 50/350                 | 6                | 47    | Maximum slope             | 8                 |
| Ippolito et al (60) | Eur Radiol/2011               | Human/97 | MD CT/16  | 80/120          | 50/350                 | 6                | 47    | Maximum slope             | NA                |
| Jiang et al (80)    | Invest Radiol/2011            | Human/23 | MD CT/16  | 100–120/200–240 | 50–70/300              | 5–7              | 33–40 | Distributed parameter     | NA                |
| Anzidei et al (79)  | JCAT/2011                     | Human/18 | MD CT/64  | 100/120         | 90/350                 | 4 <sup>§  </sup> | 60    | Maximum slope/compartment | 29.1              |
| Ng et al (88)       | AJR/2011                      | Human/24 | MD CT/16  | 120/90          | 40/320                 | 7                | 35    | Distributed parameter     | 17                |
| Petralia et al (83) | JCAT/2011                     | Human/18 | MD CT/16  | 100/240         | 40/400                 | 5 <sup>§</sup>   | 120   | Distributed parameter     | 28.8 <sup>#</sup> |
| Kim et al (12)      | Eur J Radiol/2012             | Human/17 | MD CT/64  | 80/130          | 50/370                 | 5 <sup>§</sup>   | 59.5  | Maximum slope/compartment | NA                |
| Reiner et al (54)   | Acad Radiol/2012              | Human/25 | MD CT/128 | 100/150         | 60/370                 | 5 <sup>§</sup>   | 40    | Maximum slope             | 18.4              |
| Goetti et al (106)  | Invest Radiol/2012            | Human/30 | MD CT/NA  | 100/150         | 60/300                 | 5 <sup>§</sup>   | 48.5  | Maximum slope             | 30.6              |
| Lefort et al (56)   | Ultrasound in Med & Biol/2012 | Human/16 | MD CT/32  | 80/100          | 0.5 mL per body kg/350 | 4                | 120   | Distributed parameter     | 13                |
| Yang et al (91)     | JCAT/2012                     | Human/24 | MD CT/16  | 120/150         | 50/300                 | 6                | 96    | Maximum slope             | NA                |

Note.—SD = single detector, MD = multidetector, NA = not available.

\* Injection of 25 mL saline followed the contrast agent at the same rate of 10 mL/sec as a bolus chaser.

† Contrast agent injection was followed by 0.2 mL saline solution flush.

‡ The contrast material was pushed by 10 mL of saline solution.

§ Contrast agent injection was chased by 20–40 mL saline at the same flow rate to contrast agent injection.

|| Fractionated injection protocol (30 mL at 4 mL/sec, 10 mL at 2 mL/sec, 50 mL at 1 mL/sec) was used.

# Radiation dose was summed for the combined CT perfusion and conventional triple-phase CT of the liver.

**Table E2. Summary of Clinical Study Results in Liver CT Perfusion Imaging**

| Clinical Application, Study and Reference No.         | Journal/Year | Subject Type/No. of Subjects | Primary Site and No. of Subjects | Perfusion Parameters |     |     |    |    |     | Comments |
|-------------------------------------------------------|--------------|------------------------------|----------------------------------|----------------------|-----|-----|----|----|-----|----------|
|                                                       |              |                              |                                  | HAP                  | PVP | HPI | BF | BV | MTT |          |
| Alteration of CT Perfusion Parameters in Liver Tumors |              |                              |                                  |                      |     |     |    |    |     |          |

| Metastasis          |                               |          |                                                                                                                                |   |   |   |   |   |   |                                                                                                                                                |                                                                                                                                                                                                                                                      |
|---------------------|-------------------------------|----------|--------------------------------------------------------------------------------------------------------------------------------|---|---|---|---|---|---|------------------------------------------------------------------------------------------------------------------------------------------------|------------------------------------------------------------------------------------------------------------------------------------------------------------------------------------------------------------------------------------------------------|
| Miles et al (36)    | Br J Radiol/1998              | Human/13 | Colorectum, 9; stomach, 1; lung, 1; kidney, 1; unknown, 1                                                                      | ↑ |   |   |   |   |   | Arterial perfusion was increased, both in metastases and in adjacent liver parenchyma                                                          |                                                                                                                                                                                                                                                      |
| Blomley et al (33)  | J Comput Assist Tomogr/1995   | Human/4  | Carcinoid, 2; stomach, 1; breast, 1                                                                                            | ↑ |   |   |   |   |   | Liver metastases showed an increased arterial perfusion; reproducibility of perfusion parameters was also assessed                             |                                                                                                                                                                                                                                                      |
| Leggett et al (35)  | Radiology/1997                | Human/27 | Colorectum, 27                                                                                                                 | ↑ | ↓ |   |   |   |   | Increased arterial perfusion appears to be an indicator of liver metastases, whereas reduced portal perfusion may indicate disease progression |                                                                                                                                                                                                                                                      |
| Guyennon et al (55) | World J Radiol/2010           | Human/16 | Neuroendocrine, 16                                                                                                             |   |   | ↑ | ↑ | ↑ | ↓ | ↑                                                                                                                                              | Metastatic neuroendocrine tumor showed significantly higher HPI, BF, BV, PS and significantly shorter MTT than adjacent parenchyma                                                                                                                   |
| Reiner et al (54)   | Acad Radiol/2012              | Human/20 | Colorectum, 9; cholangiocarcinoma, 2; breast, 2; pancreas, 1; stomach, 1; melanoma, 1; sarcoma, 1; kidney, 1; lung, 1; anus, 1 | ↑ | ↓ |   |   |   |   |                                                                                                                                                | Liver metastases showed a significantly increased arterial perfusion and decreased portal perfusion compared with adjacent normal parenchyma; arterial liver perfusion significantly correlated with <sup>99m</sup> Tc-MAA uptake ratio of the tumor |
| Lefort et al (56)   | Ultrasound in Med & Biol/2012 | Human/16 | Neuroendocrine tumor, 16                                                                                                       |   |   |   | ↑ |   | ↓ |                                                                                                                                                | Metastatic neuroendocrine tumor demonstrates higher BF and shorter MTT than adjacent normal liver; BF and MTT obtained at CT significantly correlated with normalized value at contrast-enhanced US                                                  |
| HCC                 |                               |          |                                                                                                                                |   |   |   |   |   |   |                                                                                                                                                |                                                                                                                                                                                                                                                      |
| Sahani et al (62)   | Radiology/2007                | Human/25 |                                                                                                                                |   |   |   | ↑ | ↑ | ↓ | ↑                                                                                                                                              | HCC shows higher BF, BV, PS and shorter MTT than normal liver; reproducibility of perfusion parameters was also shown                                                                                                                                |
| Zhu et al (63)      | Oncology/2008                 | Human/33 |                                                                                                                                |   |   |   | ↑ | ↑ | ↓ | ↑                                                                                                                                              | HCC shows significantly higher BF, BV, PS and shorter MTT than background liver parenchyma                                                                                                                                                           |
| Ippolito et al (58) | Acad Radiol/2008              | Human/47 |                                                                                                                                | ↑ | ↓ | ↑ | ↑ | ↑ |   |                                                                                                                                                | HCC shows higher BF, BV, HAP, HPI, and lower PVP than normal liver                                                                                                                                                                                   |
| Ippolito et al (60) | Eur Radiol/2011               | Human/97 |                                                                                                                                | ↑ | ↓ | ↑ | ↑ | ↑ |   |                                                                                                                                                | BF, BV, HPI, and HAP values were significantly higher, whereas PVP and time to peak were significantly lower in HCC relative to the surrounding liver; no significant correlation was found between perfusion parameters and HCC grade               |
| Early Detection     |                               |          |                                                                                                                                |   |   |   |   |   |   |                                                                                                                                                |                                                                                                                                                                                                                                                      |
| Metastasis          |                               |          |                                                                                                                                |   |   |   |   |   |   |                                                                                                                                                |                                                                                                                                                                                                                                                      |

|                                                                                   |                    |          |                                                                                                                       |   |   |   |   |         |                                                                                                                                                                                                                                                                     |
|-----------------------------------------------------------------------------------|--------------------|----------|-----------------------------------------------------------------------------------------------------------------------|---|---|---|---|---------|---------------------------------------------------------------------------------------------------------------------------------------------------------------------------------------------------------------------------------------------------------------------|
| Cuenod et al (45)                                                                 | Radiology/2001     | Rat/11   | Colorectum, 11                                                                                                        |   | ↓ | ↓ | ↑ |         | Occult liver micrometastases in rats generated changes in liver perfusion (PVP and MTT) that can be detected with CT; however, arterial perfusion was unchanged due to lack of hepatic arterial buffer response in rats                                             |
| Tsushima et al (68)                                                               | Dig Dis Sci/2001   | Human/35 | Colorectum, 11; stomach, 3; gallbladder, 3; pancreas, 2; lung, 2; lymphoma, 2; prostate, 1; esophagus, 1; control, 10 | ↑ | ↓ | ↑ |   |         | Patients with liver metastases showed increased arterial perfusion and HPI with a decrease of portal perfusion in apparently normal liver compared with controls                                                                                                    |
| Shi et al (69)                                                                    | Ai Zheng/2006      | Rat/29   | Walker-256 tumor cells, 19; control, 10                                                                               | ↑ | ↓ | → |   |         | HAP was higher and PVP was lower in rats with micrometastases than in control animals                                                                                                                                                                               |
| Staging, Grading (Provision of Prognostic Information Based on Tumor Vascularity) |                    |          |                                                                                                                       |   |   |   |   |         |                                                                                                                                                                                                                                                                     |
| Metastasis                                                                        |                    |          |                                                                                                                       |   |   |   |   |         |                                                                                                                                                                                                                                                                     |
| Miles et al (78)                                                                  | Eur Radiol/2004    | Human/80 | Colorectum, 80                                                                                                        |   |   |   |   | ○       | HPI ≥ 0.35 indicates poor survival of patients with colorectal cancer and no visible metastases on CT scans; stratification of survival risk by means of perfusion CT was superior to the Dukes classification                                                      |
| Leggett et al (35)                                                                | Radiology/1997     | Human/27 | Colorectum, 27                                                                                                        |   |   |   |   | ○       | Reduced portal perfusion may indicate progressive disease                                                                                                                                                                                                           |
| Miles et al (36)                                                                  | Br J Radiol/1998   | Human/13 | Colorectum, 9; stomach, 1; lung, 1; kidney, 1; unknown, 1                                                             |   |   |   |   | ○       | There was a statistically significant association between longer survival of the patient and high arterial perfusion values in the metastasis                                                                                                                       |
| HCC                                                                               |                    |          |                                                                                                                       |   |   |   |   |         |                                                                                                                                                                                                                                                                     |
| Sahani et al (62)                                                                 | Radiology/2007     | Human/25 |                                                                                                                       |   |   |   |   | ○ ○ ○ ○ | Well-differentiated HCC showed higher BF, BV, PS and shorter MTT values than moderately and poorly differentiated HCC                                                                                                                                               |
| Zhu et al (63)                                                                    | Oncology/2008      | Human/33 |                                                                                                                       |   |   |   |   | ○       | Patients with progressive disease had shorter baseline MTT values than those with stable disease or partial responses                                                                                                                                               |
| Jiang et al (80)                                                                  | Invest Radiol/2011 | Human/23 |                                                                                                                       |   |   |   |   | ○       | Patients with PFS > 6 months had significantly longer baseline MTT (8.27 sec ± 2.24) than those with PFS ≤ 6 months (5.64 sec ± 2.43) in 23 patients who received bevacizumab; however, baseline tumor size and attenuation did not correlate with clinical outcome |

Note.—HAP = hepatic arterial perfusion (mL/min/100 mL of tissue), PVP = portal venous perfusion (mL/min/100 mL of tissue), HPI = hepatic perfusion index (%), BF = blood flow (mL/min/100 mL of tissue), BV = blood volume (mL/100 mL of tissue), MTT = mean transit time(s), PS = permeability surface product (mL/min/100 mL of tissue), <sup>99m</sup>Tc-MAA = technetium 99m-macroaggregated albumin. ↑ = increase in value, ↓ = decrease in value, → = no change in value, ○ = values that showed significant difference.

**Table E3. Summary of Studies Reporting on Treatment Response Using CT Perfusion Imaging**

| Clinical Application, Study and Reference No.      | Journal/Year                  | Subject Type/No. of Subjects | Therapy/Drug                                                                      | Perfusion Parameters |     |     |    |    |     | Comments |                                                                                                                                                                                                                                                                                       |
|----------------------------------------------------|-------------------------------|------------------------------|-----------------------------------------------------------------------------------|----------------------|-----|-----|----|----|-----|----------|---------------------------------------------------------------------------------------------------------------------------------------------------------------------------------------------------------------------------------------------------------------------------------------|
|                                                    |                               |                              |                                                                                   | HAP                  | PVP | HPI | BF | BV | MTT |          | PS                                                                                                                                                                                                                                                                                    |
| Changes in CT Perfusion Parameters after Treatment |                               |                              |                                                                                   |                      |     |     |    |    |     |          |                                                                                                                                                                                                                                                                                       |
| <b>Metastasis</b>                                  |                               |                              |                                                                                   |                      |     |     |    |    |     |          |                                                                                                                                                                                                                                                                                       |
| Ren et al (86)                                     | Invest Radiol/2012            | Mice/123                     | Chemotherapy/ antiangiogenic agent (bevacizumab) Radiation therapy                |                      |     |     | ↓  | ↓  |     | ↓        | BF, BV, flow extraction product of the tumors significantly dropped only 1 day after antiangiogenic agent (bevacizumab) treatment and radiation therapy and changes were faster than that of tumor volume                                                                             |
| Xiong et al (87)                                   | Invest New Drugs/2004         | Human/6                      | Chemotherapy/ antiangiogenic agent (SU6668)                                       |                      |     |     | ↓  |    |     |          | There was a significant decrease of BF in six patients with liver metastases after one cycle administration of antiangiogenic drug (SU6668)                                                                                                                                           |
| Kim et al (12)                                     | Eur J Radiol/2012             | Human/17                     | Chemotherapy/cytotoxic agent                                                      |                      |     |     | ↓  |    |     | ↓        | There was a significant reduction of BF and flow extraction product in nine responders with liver metastases from colorectal cancer after one cycle administration of cytotoxic chemotherapeutic agents                                                                               |
| Kan et al (89)                                     | Radiology/2005                | Rat/14                       | Transarterial chemoembolization                                                   |                      |     |     | ↓  | ↓  | ↑   | ↓        | There was a significant decrease of BF, BV, and permeability and a significant increase of MTT after transarterial chemoembolization in 14 rats with liver metastasis; Changes in CT perfusion parameters tended to be greater in rats treated with a higher dose of embolic material |
| Choi et al (90)                                    | Invest Radiol/2010            | Rabbit/14                    | Transarterial chemoembolization                                                   |                      |     |     | ↓  | ↓  | ↑   | ↓        | There was a significant decrease of BF, BV, PS and an increase of MTT in 14 rabbit VX2 liver tumors 1 week after transarterial chemoembolization                                                                                                                                      |
| Meijerink et al (115)                              | Ultrasound in Med & Biol/2010 | Human/30                     | Chemotherapy                                                                      | ↓                    | ↑   |     |    |    |     |          | HAP of the tumors was significantly smaller and PVP was significantly larger in patients (n = 14) treated with chemotherapy than in those (n = 16) without chemotherapy                                                                                                               |
| Ng et al (88)                                      | AJR/2011                      | Human/24                     | Chemotherapy/ antiangiogenic agent (bevacizumab) or interferon                    |                      |     |     | ↓  | ↓  |     | →        | There was a significant reduction of BF and BV in 12 patients with metastatic carcinoid tumor 2 days after initiation of bevacizumab treatment; however, no significant changes in BF or BV were detected in 12 patients treated with interferon                                      |
| <b>HCC</b>                                         |                               |                              |                                                                                   |                      |     |     |    |    |     |          |                                                                                                                                                                                                                                                                                       |
| Zhu et al (63)                                     | Oncology/2008                 | Human/33                     | Chemotherapy/ antiangiogenic agent (bevacizumab) with gemcitabine and oxaliplatin |                      |     |     | ↓  | ↓  | ↑   | ↓        | Substantial decrease in BF, BV, and permeability and an increase in MTT were observed in HCCs after bevacizumab administration                                                                                                                                                        |

|                                                                                                |                    |          |                                                                                    |   |   |   |   |     |                                                                                                                                                                                                                                                   |
|------------------------------------------------------------------------------------------------|--------------------|----------|------------------------------------------------------------------------------------|---|---|---|---|-----|---------------------------------------------------------------------------------------------------------------------------------------------------------------------------------------------------------------------------------------------------|
| Jiang et al (80)                                                                               | Invest Radiol/2011 | Human/23 | Chemotherapy/ antiangiogenic agent (bevacizumab) with gemcitabine and oxaliplatin  |   | ↓ | ↓ | ↑ | ↓   | A significant decrease in BF, BV, and PS and increase in MTT were observed in advanced HCCs, 10–12 days after bevacizumab administration; changes in CT perfusion parameters were more substantial than decrease of tumor size and CT attenuation |
| Yang et al (91)                                                                                | JCAT/2012          | Human/24 | Transarterial chemoembolization                                                    | ↓ | ↓ |   |   |     | A significant decrease in HAP and HPI was noted in HCCs at 4 weeks after transarterial chemoembolization                                                                                                                                          |
| Prediction of Clinical Outcome Such as Overall Survival or Time-to-Progression after Treatment |                    |          |                                                                                    |   |   |   |   |     |                                                                                                                                                                                                                                                   |
| Metastasis                                                                                     |                    |          |                                                                                    |   |   |   |   |     |                                                                                                                                                                                                                                                   |
| Anzidei et al (79)                                                                             | JCAT/2011          | Human/18 | Chemotherapy/ antiangiogenic agent (bevacizumab) with oxaliplatin and capecitabine |   |   |   |   | ○   | Responding lesions to chemotherapy showed significantly higher PS at baseline CT perfusion than nonresponding lesions in 18 patients with colorectal liver metastases                                                                             |
| Kim et al (12)                                                                                 | Eur J Radiol/2012  | Human/17 | Chemotherapy/cytotoxic agent                                                       |   |   |   |   | ○   | Mean reduction rates of BF and flow extraction product only 1 cycle after chemotherapy were significantly higher in the responder group than in the nonresponder group                                                                            |
| HCC                                                                                            |                    |          |                                                                                    |   |   |   |   |     |                                                                                                                                                                                                                                                   |
| Zhu et al (63)                                                                                 | Oncology/2008      | Human/33 | Chemotherapy/ antiangiogenic agent (bevacizumab) with gemcitabine and oxaliplatin  |   |   |   |   | ○   | Patients with progressive disease had a greater mean percent change in MTT after bevacizumab administration than those with stable disease or a partial response                                                                                  |
| Jiang et al (80)                                                                               | Invest Radiol/2011 | Human/23 | Chemotherapy/ antiangiogenic agent (bevacizumab) with gemcitabine and oxaliplatin  |   |   |   |   |     | Percent change of CT perfusion parameter 10–12 days after bevacizumab treatment for advanced HCCs was not significantly different between patients with PFS ≤ 6 months and with PFS > 6 months.                                                   |
| Petralia et al (81)                                                                            | JCAT/2011          | Human/18 | Chemotherapy/ thalidomide                                                          |   |   |   |   | ○ ○ | Baseline BF and BV were significantly higher in 12 HCC patients with progressive disease than in six patients with stable disease after thalidomide treatment; no differences were found in baseline MTT and PS                                   |
| Early Identification of Tumor Recurrence after Local Treatment                                 |                    |          |                                                                                    |   |   |   |   |     |                                                                                                                                                                                                                                                   |
| Metastasis                                                                                     |                    |          |                                                                                    |   |   |   |   |     |                                                                                                                                                                                                                                                   |
| Mehnken et al (92)                                                                             | AJR/2011           | Human/53 | Radiofrequency ablation                                                            |   |   |   |   | ↑*  | A locally increased arterial enhancement fraction after radiofrequency ablation for liver metastasis indicated an elevated risk for future tumor relapse in those areas at least 3 months later                                                   |
| Meijerink et al (93)                                                                           | Acta Radiol/2009   | Human/11 | Radiofrequency ablation                                                            | ↑ | ↓ |   |   |     | Marginal lesions with high hepatic arterial perfusion and low hepatic portal perfusion represented recurred tumor tissue after radiofrequency ablation for liver metastases.                                                                      |

|                     |                            |           |                                 |   |   |   |   |   |                                                                                                                                                                                                                                                                                  |
|---------------------|----------------------------|-----------|---------------------------------|---|---|---|---|---|----------------------------------------------------------------------------------------------------------------------------------------------------------------------------------------------------------------------------------------------------------------------------------|
| Choi et al (90)     | Invest Radiol/2010         | Rabbit/14 | Transarterial chemoembolization |   | ↑ | ↑ | ↓ | ↑ | Marginal recurrence around TACE-treated areas showed increased BF, BV, and permeability and decreased MTT values on CT perfusion images; CT perfusion indexes of recurred tumors obtained 4 weeks after TACE were not significantly different from the indexes of primary tumors |
| <b>HCC</b>          |                            |           |                                 |   |   |   |   |   |                                                                                                                                                                                                                                                                                  |
| Ippolito et al (94) | World J Gastroenterol/2010 | Human/32  | Transarterial chemoembolization | ↑ | ↑ | ↑ |   |   | Residual tumors within TACE-treated areas showed significantly higher BF, HAP, and HPI than compactly lipiodolized area or adjacent cirrhotic parenchyma                                                                                                                         |

Note.—HAP = hepatic arterial perfusion (mL/min/100 mL of tissue), PVP = portal venous perfusion (mL/min/100 mL of tissue), HPI = hepatic perfusion index (%), BF = blood flow (mL/min/100 mL of tissue), BV = blood volume (mL/100 mL of tissue), MTT = mean transit time(s), PS = permeability surface product (mL/min/100 mL of tissue). ↑ = increase in value, ↓ = decrease in value, → = no change in value, O = values that showed significant difference.

\* Arterial enhancement fraction obtained from conventional triple-phase CT images.
